# Supplementary material for: A Randomized Double-Blind, Cross-Over Trial of very Low-Calorie Diet in Overweight Migraine Patients: A Possible Role for Ketones?
Source: Nutrients. 2019 Jul 28;11(8):1742. doi: 10.3390/nu11081742 (PMC6722531; doi:10.3390/nu11081742)
Supplement: Supplementary file 1 [file nutrients-11-01742-s001.xlsx]

## Sheet: Table S1
				Table S1: Results of blood analysis at T0 (baseline), T1 (the end of the first month of very low calorie diet) and T3 (the end of the second month of very low calorie diet).
			Baseline analysis																																			First month VLCD analysis
	Sequence	Gender	Red Blood Cells	White blood Cells	Haemoglobin	Haematocrit	Lymphocytes	Monocytes	Neutrophils	Eosinophils	Basophils	Platlets	Fibrinogen	Blood Urea Nitrogen	Creatinine	Uric Acid	Total Cholesterol	Triglycerides	HDL Cholesterol	LDL Choleserol	Total Bilirubin	Direct Bilirubin	Indirect Bilirubin	Aspartate aminotransferase	Alanine aminotransferase	Gamma-GT	Alkaline phosphatase	Sodium	Potassium	Chloride	Calcium	Magnesium	Phosphorus	Iron	Prealbumin	Albumin	Ferritin	Red Blood Cells	White blood Cells	Haemoglobin	Haematocrit	Lymphocytes	Monocytes	Neutrophils	Eosinophils	Basophils	Platlets	Fibrinogen	Blood Urea Nitrogen
			(10^6 µL)	(10^3 µL)	(g/dL)	(%)	(%)	(%)	(%)	(%)	(%)	(10^3 µL)	(mg/dL)	(mg/dL)	(mg/dL)	(mg/dL)	(mg/dL)	(mg/dL)	(mg/dL)	(mg/dL)	(mg/dL)	(mg/dL)	(mg/dL)	(u/L)	(u/L)	(u/L)	(u/L)	(mmol/L)	(mmol/L)	(mmol/L)	(mmol/L)	(mmol/L)	(mmol/L)	(mmol/L)	(g/dL)	(g/dL)	(ng/ml)	(10^6 µL)	(10^3 µL)	(g/dL)	(%)	(%)	(%)	(%)	(%)	(%)	(10^3 µL)	(mg/dL)	(mg/dL)
1	B->R	F	5.06	5.8	11.9	37.7	24.8	7.4	62.7	4.8	0.3	231	545	32	0.68	4.1	177	49	77	86	0.54	0.11	0.43	25	47	24	67	135	4.4	100	2.11	2.1	1.03	38	18.98	3.8	4	5.09	4.8	12.2	37.9	26	12.2	55.8	5.6	0.4	183	366	23
2	R->B	F	4.87	8.5	13.8	40.7	28	7.3	62.3	2.2	0.2	294	251	33	0.69	5.5	238	114	57	161	0.41	0.09	0.32	19	41	32	56	136	4.9	101	2.21	2	1.11	105	34.77	4.3	31	4.6	5.1	12.9	38.9	37	9.1	52.1	1.6	0.2	253	233	18
3	R->B	F	5.14	9.3	14.9	41.9	22.3	7.3	68.6	1.4	0.4	226	545	28	0.71	5.2	210	128	40	141	0.25	0.08	0.17	9	32	24	52	138	4.3	101	2.28	1.9	1.03	84	26.88	4.5	83	5.15	9	15.1	42	19.1	9.3	70	1.2	0.4	217	559	23
4	R->B	F	4.52	7.8	13.3	39.3	24.9	8.7	60.2	5.7	0.5	251	416	33	0.79	3.7	233	134	44	154	0.45	0.08	0.37	14	38	26	55	137	4.4	102	2.11	2.2	1.28	89	25.89	3.7	49	4.76	6.3	13.9	41.4	30.6	8.8	54.7	5.4	0.5	233	416	25
5	R->B	M	5.32	4.4	17	46.7	34.7	7.4	55.4	1.6	0.9	210	263	40	0.94	5.5	196	49	54	130	0.41	0.11	0.3	36	74	31	64	139	4.8	102	2.24	1.8	0.92	91	24.91	3.6	151	5.06	3.4	16.3	44.4	40.8	11.4	45.1	1.8	0.9	217	545	44
6	B->R	M	5.51	6.4	16.6	46.2	29.4	7.6	59.5	3	0.5	217	294	25	1.06	5.6	205	143	40	140	1.39	0.21	1.18	33	80	39	76	137	4.4	101	2.29	2	1.16	142	28.85	4.4	216	5.26	5.4	15.6	45.1	30.9	7.2	58.9	2.6	0.4	203	327	24
7	R->B	F	4.8	7.12	13.8	41.1	31.2	7.84	57.7	2.9	0.4	239	377	23	0.63	5.3	205	80	57	124	0.3	0.07	0.23	25	40	25	83	137	4.7	101	2.22	2.1	1.04	93	27.87	3.7	19	5	9.3	15	44	25	5.4	66	1.9	0.5	274	254	33
8	B->R	F	4.8	7.12	13.8	41.1	31.2	7.84	57.7	2.9	0.4	239	377	27	0.47	3.7	208	86	49	135	0.38	0.07	0.31	14	35	25	87	135	4.3	98	2.26	2.2	1.12	45	19.97	4.2	29	4.78	5.7	13	40	30.4	10.8	56.4	1.9	0.5	324	484	22
9	R->B	F	4.8	7.12	13.8	41.1	31.2	7.84	57.7	2.9	0.4	239	377	36	0.68	3.7	201	74	64	120	0.54	0.09	0.45	22	52	56	76	138	4.3	102	2.14	1.7	0.95	112	25.8	3.8	47	4.64	4.4	13	38.7	30.7	11.5	55.7	1.6	0.5	194	254	30
10	B->R	M	5.13	9.4	14.7	42.6	30.8	7.8	59.6	1.6	0.2	231	424	28	0.81	7	171	226	31	104	0.92	0.14	0.78	31	68	38	94	143	3.9	105	2.19	1.9	1.18	66	23.92	4	101	5.37	6.9	15.3	45.2	35.9	8.4	53.8	1.6	0.3	182	336	15
11	R->B	F	4.3	6.2	12.7	38.4	42.2	11.2	42.5	3.6	0.5	296	377	41	0.55	2.6	195	57	75	106	0.83	0.13	0.7	19	33	26	84	139	4.5	101	2.31	2.1	1.29	60	25.89	4	76	4.43	6.2	13	39.5	37	9.2	51.4	2.1	0.3	248	434	33
12	B->R	F	4.87	7.1	13	38.5	28.8	6.1	61.3	3.5	0.3	175	366	29	0.71	4.2	189	74	53	125	0.39	0.08	0.31	16	42	30	77	142	3.9	103	2.14	2	1.05	65	21.94	3.8	35	4.86	5.4	13.2	38.7	33.3	6.6	55.6	4.1	0.4	171	407	32
13	R->B	F	4.74	7.8	13.4	39.4	33.6	8.9	55.3	1.8	0.4	252	366	25	0.94	5.8	166	41	55	102	1.06	0.18	0.88	15	27	21	56	139	4.9	103	2.29	2	1.23	96	23.92	3.8	13	4.93	6.2	14	42	33	10.9	54.3	1.3	0.5	217	416	24
14	B->R	F	4.6	7.2	13.8	42.1	23.5	9.2	61.9	5.1	0.3	250	465	23	0.6	3.6	228	87	49	160	0.27	0.07	0.2	12	32	24	76	141	4	106	2.16	2	1.14	62	20.96	3.4	76	4.76	7	14.3	43.7	22.7	9.4	64.2	3.3	0.4	238	385	27
15	R->B	F	5.08	6.3	14.5	43.5	31.9	7.3	59.5	1.1	0.2	284	316	27	0.67	4	155	45	49	92	0.46	0.09	0.37	15	47	33	90	142	3.7	105	2.09	2.1	0.94	145	21.94	3.6	12	5.38	5	15.4	45.6	36.9	7.6	54.1	1.2	0.2	249	385	38
16	R->B	F	4.73	5.8	14.3	41.9	33.3	6.2	57.4	2.8	0.3	260	340	30	0.75	3.4	160	73	61	85	0.33	0.08	0.25	16	39	32	75	143	4.6	106	2.24	2.2	1.31	72	24.91	3.6	153	5.13	8.2	15.4	45.3	17.1	6.9	73.1	2.4	0.5	239	385	36
17	B->R	F	4.46	9.7	13.6	40.1	37.3	7.6	52.8	2.2	0.1	290	340	34	0.73	6.2	209	349	42	108	0.39	0.06	0.33	17	42	38	63	139	4.4	103	2.34	1.9	1.31	96	26.88	3.5	26	4.52	7.6	13.6	40.8	38.9	7.3	51.3	2.4	0.1	313	381	28
18	B->R	F	4.58	6	14.2	41.7	37.3	7.9	48.8	5.5	0.5	170	415	30	0.8	6.7	212	130	54	124	0.44	0.09	0.35	20	41	31	72	141	3.9	99	2.36	2	1.4	65	30.83	4.1	146	4.64	6	14.2	42.2	36.4	8.5	51.7	2.7	0.7	154	385	33
19	R->B	F	4.75	5.1	12.7	39.3	33.7	5.7	57.4	2.8	0.4	211	330	15	0.75	4.6	193	112	44	124	0.44	0.1	0.34	16	41	39	55	139	4	101	2.34	2	1.33	41	25.89	4	7	4.88	3.5	13.2	40.8	32.1	7.7	57	2.6	0.6	169	385	27
20	R->B	F	4.68	8.8	14.1	42.5	16.2	7.4	74.2	2	0.2	212	325	29	0.62	5.1	150	45	49	86	0.21	0.05	0.16	10	29	23	56	140	4.2	102	2.36	2	1.18	88	34.77	4.4	29	4.58	5.2	13.9	40.8	29.8	9	58.7	2.1	0.4	171	283	28
21	R->B	F	4.54	7.1	12.1	37.4	36.7	8.7	50.5	3.7	0.4	268	345	28	0.61	3.2	166	36	61	87	0.18	0.04	0.14	11	27	16	55	141	4.8	103	2.22	2	1.34	26	21.94	3.8	11	4.47	7	12.2	37.1	39.1	8.9	48.6	3	0.4	254	362	50
22	B->R	F	4.81	7	13.9	41	28.7	7.6	59.4	4	0.3	277	394	23	0.49	4.2	172	37	46	116	0.27	0.05	0.22	10	31	20	52	141	4	102	2.07	1.9	1.05	61	24.91	3.7	24	5.03	8.7	14.4	42.2	24.4	7.1	65.9	2.3	0.3	231	335	13
23	B->R	F	4.56	8.1	13.8	41	31.4	8	56	4.1	0.5	157	387	22	0.68	3.6	201	49	73	112	0.41	0.09	0.32	24	42	16	53	139	4.8	103	2.24	2.1	1.24	73	22.93	3.6	14	4.57	6.1	14.1	40.9	31.6	7.2	58.2	2.5	0.5	145	335	22
24	B->R	F	4.01	7.4	10.2	33.9	21.3	5.3	71.7	1.4	0.3	327	362	28	0.69	3.3	130	122	54	59	0.68	0.12	0.56	13	26	20	58	143	4.3	106	2.07	1.9	1.13	54	25.89	2.7	3	4.09	6.3	10.5	34.1	20.5	6.4	70.9	1.9	0.3	297	356	26
25	R->B	F	4.95	5.7	13.4	40.4	29.1	7.1	62.4	1.2	0.2	248	495	20	0.69	5.9	197	63	62	123	0.78	0.14	0.64	25	71	26	81	143	4.2	104	2.34	2.1	1.3	125	27.87	3.9	30	5.3	4.7	14.5	42.5	36.9	8.1	52.7	1.9	0.4	242	465	15
26	R->B	M	5.15	8.6	16.1	46.2	38.5	8.3	50.6	2.4	0.2	172	401	19	0.69	6.2	183	147	37	127	0.37	0.07	0.3	14	40	29	53	141	4.6	101	2.21	1.9	1.35	81	28.57	4	87	5.02	8.2	15.6	45.5	34.2	6.8	56.6	2.3	0.1	168	439	22
27	R->B	F	4.65	7.1	13.9	42.3	38.4	10.1	46.9	4.2	0.4	236	356	22	0.69	4.7	223	69	62	140	0.71	0.12	0.59	38	76	38	66	141	4.2	103	2.24	1.8	1.16	63	24.66	3.9	34	4.94	7.4	14.5	43.9	30.2	9.5	57	2.9	0.4	223	447	28
28	B->R	F	4.91	6.6	14.9	45	35.3	8.4	55.2	0.6	0.5	269	381	52	0.75	5.2	223	142	62	127	0.45	0.1	0.35	31	86	79	114	144	4.8	105	2.43	2.1	1.35	115	23.68	4.4	46	4.66	4	14.1	42.5	28.1	11.1	60.2	0.3	0.3	210	391	42
29	R->B	F	4.66	5.8	12.2	38.2	39.5	9.3	47.4	3.3	0.5	214	325	20	0.73	5.5	202	150	45	128	0.26	0.06	0.2	30	58	30	53	142	4.6	104	2.23	1.9	1.3	33	20.75	3.6	17	4.96	4.8	13.5	41.4	38.1	9.5	47.2	4.4	0.8	200	412	25
			Red Blood Cells	White blood Cells	Haemoglobin	Haematocrit	Lymphocytes	Monocytes	Neutrophils	Eosinophils	Basophils	Platlets	Fibrinogen	Blood Urea Nitrogen	Creatinine	Uric Acid	Total Cholesterol	Triglycerides	HDL Cholesterol	LDL Choleserol	Total Bilirubin	Direct Bilirubin	Indirect Bilirubin	Aspartate aminotransferase	Alanine aminotransferase	Gamma-GT	Alkaline phosphatase	Sodium	Potassium	Chloride	Calcium	Magnesium	Phosphorus	Iron	Prealbumin	Albumin	Ferritin
			5.25	5.8	12.7	38.4	23.7	9.7	60.5	5.6	0.5	223	453	45	0.75	4.1	148	46	56	77	0.46	0.11	0.35	22	35	20	46	138	4.6	102	2.2	2.1	1.26	28	15.04	3.9	6
			4.86	7.4	14.1	40.1	26	8.2	63.8	1.2	0.8	201	434	17	0.72	5.2	161	94	33	104	0.36	0.08	0.28	13	33	24	48	137	4.3	101	2.31	1.8	1	93	26.88	4.5	94
			4.5	5.9	13	39.6	28.5	8.5	55.4	7.1	0.5	232	310	24	0.8	2.9	172	132	41	100	0.51	0.09	0.42	17	33	20	41	140	4.2	105	2.08	2.1	1.04	87	25.89	3.7	39
			4.83	3.4	15.4	43.2	38.2	8.4	51.6	1.2	0.6	185	266	41	0.77	5	141	34	49	81	0.59	0.14	0.45	22	36	20	49	140	4.7	103	2.14	1.9	0.88	102	24.91	3.5	186
			5.27	6.6	15.6	45.5	22.4	5	70.6	1.7	0.3	225	416	27	0.93	5.2	171	77	40	108	0.68	0.13	0.55	23	47	21	64	139	4.3	102	2.26	2.2	0.86	52	25.89	4.4	158
			4.53	9.5	13.1	40.4	26.9	5.8	63.9	3	0.4	309		37	0.7	5.5	200	41	65	124	0.26	0.07	0.19	24	44	24	84	136	4.7	99	2.25	2	1.3	71	29.84	3.4	14
			4.62	6	12.7	38.9	32.9	10.3	54.3	2.2	0.3	328	507	28	0.49	3.7	202	68	46	135	0.29	0.08	0.21	19	37	23	80	136	4.3	99	2.26	2	1.35	39	18.98	4	30
			4.74	8.7	13.5	39.7	15.6	9.5	73.6	1.1	0.2	212	273	45	0.73	3.3	172	72	56	100	0.54	0.12	0.42	12	32	28	56	139	4.3	100	2.33	1.7	1.17	59	22.93	4.2	69
			5.59	8.4	15.8	46.7	36.6	7.8	54	1.4	0.2	213	484	20	0.84	6.7	157	162	32	101	0.79	0.11	0.68	22	44	30	91	144	4.2	103	2.16	2	1.27	50	29.84	4	70
			4.63	6.3	13.7	41.7	44.2	10.7	41.4	3.2	0.5	269	573	31	0.76	3.5	210	41	79	122	1.02	0.14	0.88	22	33	23	73	146	4.9	103	2.35	2.1	1.49	66	25.89	4.2	80
			5.05	7.5	13.9	40.7	28.2	5.9	62.4	3.1	0.4	231	439	24	0.9	4.2	199	118	57	126	0.35	0.08	0.27	13	37	23	107	142	4	104	2.19	2.1	1.27	69	22.93	4	38
			4.42	7.4	12.6	38	28.9	7.5	62.1	1.2	0.3	200	335	20	0.83	4.7	123	38	45	67	0.76	0.14	0.62	14	27	14	45	140	4.8	105	2.15	1.9	1.21	51	18	3.4	11
			4.58	7.9	13.9	41.8	22.3	9.3	63.9	4.2	0.3	216	485	22	0.61	3.4	206	91	38	145	0.29	0.07	0.22	17	34	23	74	143	4	106	2.1	2	1.06	72	18.8	3.3	67
			5.07	3.9	14.5	42.9	31.9	13.9	52.9	1.3	0	195	387	24	0.71	3.8	119	42	37	68	0.33	0.08	0.25	21	49	24	77	141	4	105	2.13	1.9	0.79	30	13.92	3.4	12
			4.98	5.3	14.8	44.4	36.4	7	52.2	4	0.4	240	368	50	0.79	3.3	171	78	64	86	0.47	0.11	0.36	22	57	35	74	146	5.2	107	2.32	2.3	1.38	99	29.55	3.9	203
			4.21	8.3	13	38.3	35.4	8	53.7	2.8	0.1	279	362	40	0.83	6.2	178	228	32	97	0.34	0.07	0.27	19	45	33	60	144	4.5	106	2.28	2	1.35	43	26.62	3.5	30
			4.67	5.1	14.4	42.7	35.5	9	49	5.7	0.8	144	456	36	0.71	6.1	181	106	46	109	0.41	0.1	0.31	21	44	28	64	143	4.2	104	2.35	2.2	1.43	80	29.55	3.9	173
			5.06	4.5	13.8	42	13.9	8.7	76.3	0.9	0.2	157	447	18	0.84	3.9	135	85	35	78	0.61	0.14	0.47	14	32	31	52	141	4	102	2.33	2.1	1.18	21	19.78	4.3	20
			5.03	9.6	15.5	45.6	22.1	5.8	67.9	3.8	0.4	228	428	33	0.65	5.8	133	64	40	75	0.33	0.08	0.25	13	31	27	59	146	4.7	105	2.42	2.1	1.23	96	28.57	5	28
			4.63	10	12.7	39	30.9	7.6	59	2.2	0.3	274	398	44	0.71	3.2	164	49	64	83	0.3	0.08	0.22	12	30	19	56	149	4.9	109	2.21	1.9	1.56	50	20.75	4.1	6.62
			5.2	5.2	15	44.1	34.2	8.3	54.4	2.5	0.6	244	398	19	0.59	4	162	49	44	105	0.36	0.09	0.27	10	31	18	50	148	4.4	107	2.29	2	1.36	68	20.75	4.5	33
			4.51	7.5	13.9	41	33.6	7.1	56.2	2.8	0.3	191	353	32	0.74	4.5	194	48	63	120	0.62	0.14	0.48	15	31	20	48	150	4.4	106	2.26	2.1	1.21	121	14.89	4.1	14
			4.52	5.7	11.3	37.1	26.2	6.4	64.8	2.1	0.5	336	471	30	0.8	4	150	140	62	66	0.58	0.12	0.46	22	33	23	75	146	4.1	106	2.19	1.8	1.24	37	20.75	3.1	2
			5.17	6.8	14.3	42.6	24.9	5.1	68.6	1.3	0.1	243	600	17	0.7	5.1	187	82	45	120	0.85	0.19	0.66	38	129	29	85	140	4.4	102	2.29	2.1	1.2	117	23.68	4	34
			5.15	9.5	16	46.1	36.2	7.2	54.8	1.6	0.2	173	512	27	0.77	6.1	219	216	38	140	0.45	0.09	0.36	13	27	29	55	144	4.6	104	2.36	2.1	1.38	99	30.52	4.2	84
			4.77	6.9	14.2	42.6	41.2	8.3	47.8	2.3	0.4	218	428	28	0.77	4.4	230	69	55	155	0.88	0.15	0.73	18	33	34	67	143	4.4	104	2.36	2.1	1.43	88	23.68	4.2	31
			4.41	6	13.4	40.2	38	7.4	53.8	0.3	0.5	230	359	55	0.77	5.5	184	85	52	110	0.41	0.1	0.31	19	31	71	95	141	4.7	104	2.35	2.3	1.28	77	24.66	4	42
			4.92	7.2	14	41.2	30.5	7.6	59.4	2.1	0.4	202	471	16	0.75	5.5	223	131	61	139	0.37	0.08	0.29	17	29	23	54	140	4.3	102	2.39	2	1.61	59	29.55	3.9	13
[truncated: 58 more columns]

## Sheet: Figure S1
				Figure S1: Profiles of averages. Means and standard errors of means from T1 to T5 of clinical variables in “R ≥ B” and “B ≥ R” groups. The two VLCD periods were between T1 and T2 and between T3 and T4. Red line indicates VLCKD; blue line indicates VLCnKD.
